# Supplementary material for: Neuronal T-Cell Autoreactivity Is Amplified in Overweight Children With New-Onset Insulin-Requiring Diabetes
Source: Oxford University Press journal article supplement (doi:10.2337/dc14-1861), 2014-11-20
Supplement: dc141861supplementarydata.pdf [file dc141861supplementarydata.pdf]

SUPPLEMENTARY DATA

**Supplementary Figure 1.** Patient selection flowsheet

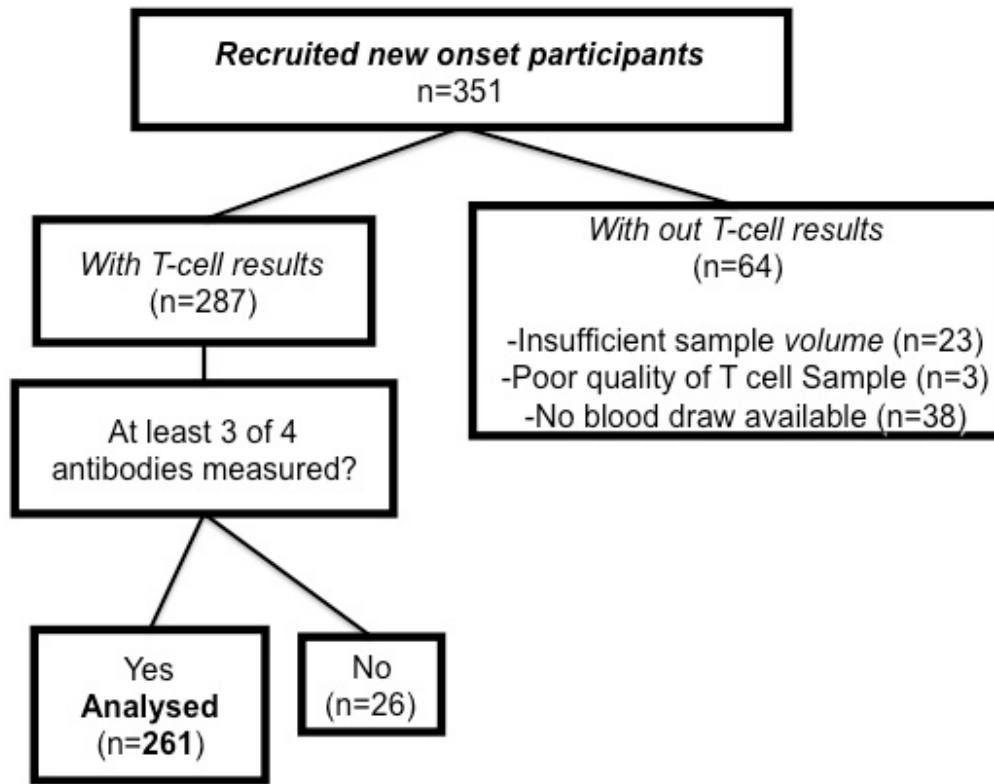

**Supplementary Figure 2.** Black bar: <25<sup>th</sup> percentile; White bar: 25<sup>th</sup>-85<sup>th</sup> percentile; Hashed bar: >85<sup>th</sup> percentile. \* p<0.05.

Left axis: diabetes related analytes. Right axis: positive control analytes (note different scales)

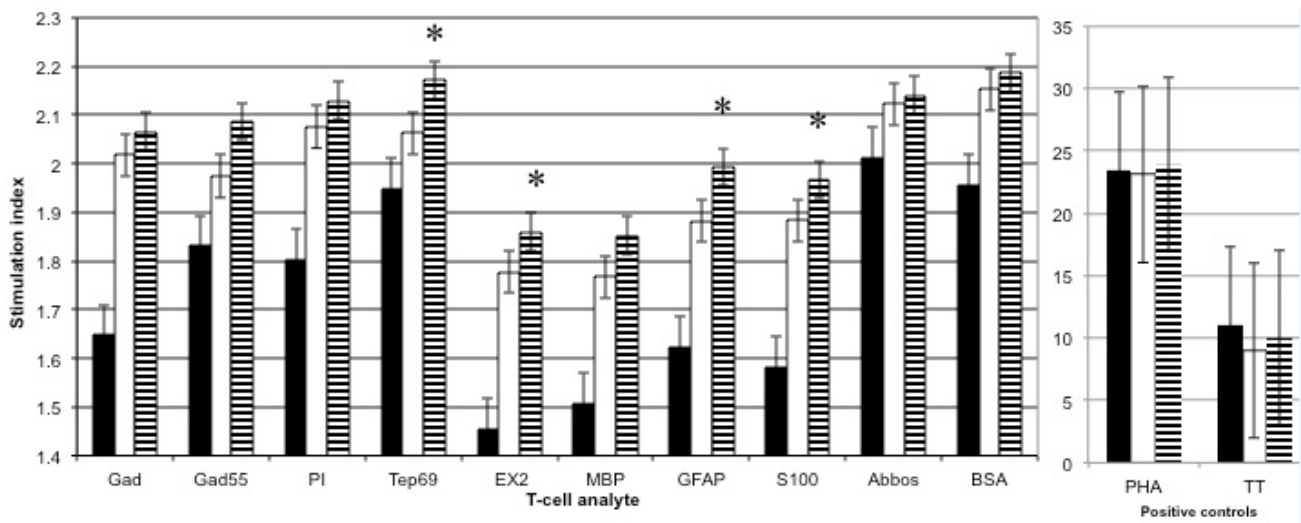

SUPPLEMENTARY DATA

**Supplementary Table 1.** Description of diabetes specific T cell test analytes and SI

| Analyte | Description                                                                                                                                                     | Usage                                                  | New onset diabetes (n=261) Median SI [IQR] | FDR controls (n=45) Median SI [IQR] | P      |
|---------|-----------------------------------------------------------------------------------------------------------------------------------------------------------------|--------------------------------------------------------|--------------------------------------------|-------------------------------------|--------|
| Gad     | Glutamic acid decarboxylase, an islet protein also present in neuronal sheath, (5 µg/ml)                                                                        | Test analyte                                           | 2.0 [1.7-2.3]                              | 1.1 [1-1.2]                         | <0.001 |
| Gad55   | A Gad epitope peptide (5 µg/ml)                                                                                                                                 | Test analyte                                           | 2.0 [1.7-2.3]                              | 1.1 [1-1.2]                         | <0.001 |
| PI      | Pro-insulin, an islet specific protein (1 µg/ml)                                                                                                                |                                                        | 2.1 [1.8-2.4]                              | 1.1 [1-1.3]                         | <0.001 |
| Tep69   | An epitope of ICA69 (islet cell antibody) often targeted in type 1 diabetes, 2 way mimicry antigen with ABBOS, has both neuronal and islet properties (5 µg/ml) | Test analyte                                           | 2.1 [1.8-2.4]                              | 1.1 [1-1.2]                         | <0.001 |
| MBP     | Myelin basic protein, a myelin autoantigen commonly targeted in type 1 diabetes and MS, (5 ug/mL)                                                               | Test analyte                                           | 1.8 [1.6-2.0]                              | 1.1 [1-1.2]                         | <0.001 |
| EX2     | A major myelin basic protein autoimmune target epitope (splice variant) expressed in developing myelin and remyelination (5ug/mL)                               | Test analyte                                           | 1.8 [1.6-2.0]                              | 1.1 [1-1.2]                         | <0.001 |
| GFAP    | Glial Fibrillary Acid Protein, A glial autoantigen often targeted in type 1 diabetes and MS (0.5 ug/mL)                                                         | Test analyte                                           | 2.0 [1.7-2.2]                              | 1.1 [1-1.2]                         | <0.001 |
| S100    | An epitope of GFAP often targeted in type 1 diabetes and MS (0.5 ug/mL)                                                                                         | Test analyte                                           | 1.9 [1.6-2.2]                              | 1.1 [1-1.2]                         | <0.001 |
| ABBOS   | A milk epitope peptide commonly targeted in type 1 diabetes, 2-way mimicry with ICA-69 (5 µg/ml)                                                                | Test analyte                                           | 2.1 [1.9-2.4]                              | 1.1 [1-1.3]                         | <0.001 |
| BSA     | Bovine Serum Albumin containing the ABBOS epitope (5 µg/ml)                                                                                                     | Test analyte                                           | 2.2 [1.9-2.5]                              | 1.1 [1-1.1]                         | <0.001 |
| PHA     | Phytohemagglutinin, T-cell mitogen (1 µg/ml)                                                                                                                    | Positive control, proliferation competence             | 23 [19-26]                                 | 21 [17-26]                          | 0.1    |
| TT      | Tetanus toxoid (0.1 µg/ml)                                                                                                                                      | Positive control, post-vaccination response competence | 10 [8-11]                                  | 9 [7-10.5]                          | 0.07   |
| OVA     | Ovalbumin- dietary protein (5 µg/ml)                                                                                                                            | Negative control                                       | 1.0 [1-1.1]                                | 1.0 [1-1.1]                         | 0.25   |
| Actin   | Human actin (5 µg/ml)                                                                                                                                           | Negative control                                       | 1.1 [1-1.1]                                | 1.0 [1-1.1]                         | 0.1    |
